# Supplementary material for: Dynamic Chirality Beyond Configuration: Reversible Exchange of Chirality Type
Source: Research Square preprint supplement (doi:10.21203/rs.3.rs-7963977/v1), 2025-12-09
Supplement: Supplementary file 1 [file cfc828fead0f5d7ef80df86c.docx]

Computational Data Access Link:

<https://rdl-share.ucsd.edu/message/HuGUleTtI31ybhOasv3QZK>
